# Supplementary material for: HPV DeepSeq: An Ultra-Fast Method of NGS Data Analysis and Visualization Using Automated Workflows and a Customized Papillomavirus Database in CLC Genomics Workbench
Source: MDPI journal article supplement (doi:10.3390/pathogens10081026), 2021-08-13
Supplement: s1 [file s1]

Article

# HPV DeepSeq: An Ultra-Fast Method of NGS Data Analysis and Visualization Using Automated Workflows and a Customized Papillomavirus Database in CLC Genomics Workbench

Jane Shen-Gunther <sup>1,\*</sup>, Qingqing Xia <sup>2</sup>, Hong Cai <sup>3,4</sup> and Yufeng Wang <sup>3,4,\*</sup>

<sup>1</sup> Gynecologic Oncology & Clinical Investigation, Department of Clinical Investigation, Brooke Army Medical Center, Fort Sam Houston, TX 78234, USA

<sup>2</sup> Department of Clinical Investigation, Brooke Army Medical Center, Fort Sam Houston, TX 78234, USA; qingqing.xia.civ@mail.mil

<sup>3</sup> Department of Biology, University of Texas at San Antonio, San Antonio, TX 78249, USA; hong.cai@utsa.edu

<sup>4</sup> South Texas Center for Emerging Infectious Diseases, University of Texas at San Antonio, San Antonio, TX 78249, USA

\* Correspondence: jane.shengunther.mil@mail.mil (J.S.-G.); yufeng.wang@utsa.edu (Y.W.)

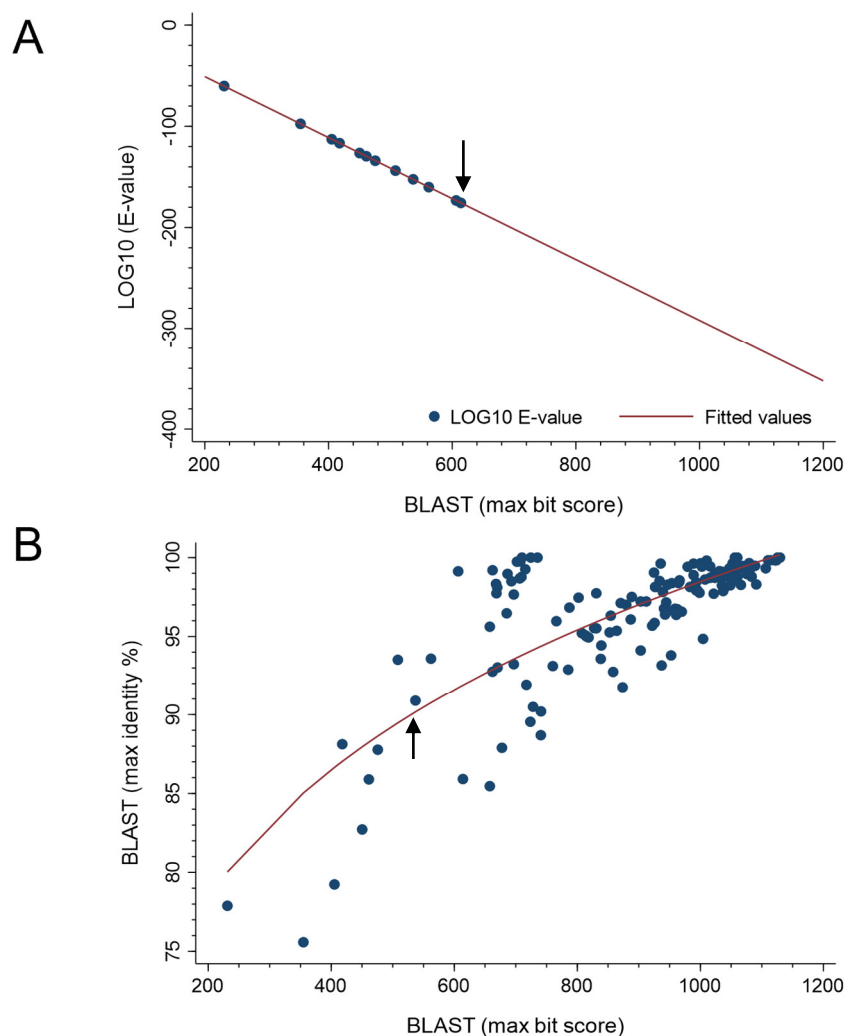

**Figure S1.** Correlation between BLAST statistics. (A) Scatterplot of BLAST maximum bit score and  $\log_{10}$  E-value for the study samples ( $n = 154$ ) showed a perfect linear negative-correlation ( $R^2 = 1.0$ ). The regression line ( $\log_{10}$  E-value =  $9.41 + -0.301 * \text{max bit score}$ ) shown as (—) may be employed for prediction of E-values based on bit scores. E-values  $< 2.13\text{E-}176$  ( $\log_{10}$  -176) equivalent to max bit scores  $> 614$  ( $\downarrow$ ) were rounded and reported as 0 and interpreted as *identical* between the query and hit sequences in the BLAST report. Extrapolation of the fitted line allows for prediction of actual E-values based on bit scores (range 200-1,200) as shown. (B) Scatterplot of BLAST maximum bit score and maximum identity (%) for the study samples ( $n = 154$ ) showed high curvilinear correlation ( $R^2 = 0.999$ ). The least squares regression curve ( $\text{max identity \%} = 37.02 * \text{max bit score}^{0.1416}$ ) (—) based on the *power* equation model may be employed for prediction of max identity based on bit score. Bit scores  $< 531$  equivalent to an E-value  $> 3.793\text{E-}151$  ( $\log_{10}$  -150) and max identity of  $< 90\%$  ( $\uparrow$ ) may serve as a threshold for quality checks by manual verification of HPV genotype. Of note, one sample was excluded from the plot due to zero BLAST hits.

Table S2. HPV E6/E7 Sanger and deep sequencing results .

| Sample Info <sup>a</sup> |         |      | Seq <sup>b</sup> | Deep Sequencing <sup>c</sup> |                        |                                                         |         |       |       |       |       |       |      |      |      |      |      |      |
|--------------------------|---------|------|------------------|------------------------------|------------------------|---------------------------------------------------------|---------|-------|-------|-------|-------|-------|------|------|------|------|------|------|
|                          |         |      |                  | Reads Info <sup>d</sup>      |                        | HPV Genotypes and Proportional Composition <sup>e</sup> |         |       |       |       |       |       |      |      |      |      |      |      |
| ID                       | PL      | PAP  | HPV Type         | Total Merged Reads (n)       | Total Mapped Reads (n) | HPV Type (n)                                            | HPV#1   | HPV#2 | HPV#3 | HPV#4 | HPV#5 | HPV#6 | p#1  | p#2  | p#3  | p#4  | p#5  | p#6  |
| PC_2994                  | P11_A1  | LSIL | 39 A2            | 88,812                       | 42,478                 | 5                                                       | 39 A    | 35    | 52    | 16    | 91    | -     | 0.62 | 0.32 | 0.03 | 0.02 | 0.02 | -    |
| PC_3002                  | P11_A2  | LSIL | 35 A2            | 434,264                      | 325,254                | 3                                                       | 35 A1,2 | 39    | 52    | -     | -     | -     | 0.96 | 0.03 | 0.01 | -    | -    | -    |
| PC_3010                  | P11_A3  | LSIL | 39 A2            | 592,196                      | 451,184                | 4                                                       | 39 A    | 52    | 91    | 35    | -     | -     | 0.71 | 0.26 | 0.02 | 0.01 | -    | -    |
| PC_3018                  | P11_A4  | LSIL | 91               | 255,520                      | 187,892                | 2                                                       | 91      | 39    | -     | -     | -     | -     | 0.93 | 0.07 | -    | -    | -    | -    |
| PC_3042                  | P11_A5  | LSIL | 39 A2            | 104,718                      | 32,356                 | 2                                                       | 39 A    | 16    | -     | -     | -     | -     | 0.99 | 0.01 | -    | -    | -    | -    |
| PC_3050                  | P11_A6  | LSIL | 39 A2            | 301,906                      | 237,922                | 1                                                       | 39 A    | -     | -     | -     | -     | -     | 1.00 | -    | -    | -    | -    | -    |
| PC_3058                  | P11_A7  | LSIL | 39 A2            | 201,850                      | 153,368                | 2                                                       | 39 A    | 62    | -     | -     | -     | -     | 0.99 | 0.01 | -    | -    | -    | -    |
| PC_3066                  | P11_A8  | LSIL | 39 A2            | 404,354                      | 313,146                | 2                                                       | 39 A    | 91    | -     | -     | -     | -     | 0.97 | 0.03 | -    | -    | -    | -    |
| PC_3074                  | P11_A9  | LSIL | 91               | 353,110                      | 261,928                | 4                                                       | 91      | 39    | 43    | 54    | -     | -     | 0.75 | 0.12 | 0.10 | 0.02 | -    | -    |
| PC_3082                  | P11_A10 | LSIL | 66 B1*           | 37,944                       | 24,160                 | 5                                                       | 66 B1   | 39    | 35    | 16    | 62    | -     | 0.53 | 0.36 | 0.06 | 0.04 | 0.01 | -    |
| PC_3003                  | P11_A11 | LSIL | 66 B1            | 71,374                       | 26,432                 | 6                                                       | 66 B1   | 35    | 84    | 16    | 54    | 62    | 0.50 | 0.18 | 0.17 | 0.06 | 0.04 | 0.04 |
| PC_3011                  | P11_A12 | LSIL | 35 A2            | 388,530                      | 297,058                | 5                                                       | 35 A1,2 | 62    | 66    | 16    | 54    | -     | 0.74 | 0.14 | 0.05 | 0.04 | 0.02 | -    |
| PC_3019                  | P11_B1  | LSIL | 16 A1            | 640,246                      | 495,266                | 2                                                       | 16 A1   | 39    | -     | -     | -     | -     | 0.99 | 0.01 | -    | -    | -    | -    |
| PC_3059                  | P11_B2  | LSIL | 39 A2            | 283,076                      | 190,446                | 3                                                       | 39 A    | 62    | 16    | -     | -     | -     | 0.74 | 0.25 | 0.01 | -    | -    | -    |
| PC_3067                  | P11_B3  | LSIL | 16 A1            | 144,894                      | 79,200                 | 5                                                       | 16 A1   | 68    | 39    | 43    | 82    | -     | 0.90 | 0.04 | 0.03 | 0.01 | 0.01 | -    |
| PC_3075                  | P11_B4  | LSIL | 16 A1            | 265,916                      | 216,072                | 3                                                       | 16 A1   | 43    | 39    | -     | -     | -     | 0.54 | 0.41 | 0.06 | -    | -    | -    |
| PC_3083                  | P11_B5  | LSIL | 58 C1            | 202,370                      | 130,742                | 3                                                       | 58 C1   | 43    | 39    | -     | -     | -     | 0.72 | 0.26 | 0.01 | -    | -    | -    |
| PC_2996                  | P11_B6  | LSIL | 62               | 85,356                       | 12,134                 | 6                                                       | 62      | 30    | 61    | 39    | 51    | 54    | 0.61 | 0.23 | 0.07 | 0.04 | 0.02 | 0.02 |
| PC_3004                  | P11_B7  | LSIL | 30 A3            | 229,388                      | 150,402                | 3                                                       | 30 A    | 54    | 39    | -     | -     | -     | 0.92 | 0.07 | 0.01 | -    | -    | -    |
| PC_3020                  | P11_B8  | LSIL | 30 A3            | 232,398                      | 106,562                | 4                                                       | 30 A2   | 39    | 51    | 89    | -     | -     | 0.54 | 0.42 | 0.03 | 0.01 | -    | -    |
| PC_3028                  | P11_B9  | LSIL | 51               | 447,206                      | 288,514                | 2                                                       | 51 B1   | 89    | -     | -     | -     | -     | 0.81 | 0.19 | -    | -    | -    | -    |
| PC_3036                  | P11_B10 | LSIL | 16 A1            | 124,796                      | 59,988                 | 2                                                       | 16 A1   | 39    | -     | -     | -     | -     | 0.87 | 0.13 | -    | -    | -    | -    |
| PC_3044                  | P11_B11 | LSIL | 39 A2            | 315,946                      | 238,710                | 2                                                       | 39 A    | 68    | -     | -     | -     | -     | 0.99 | 0.01 | -    | -    | -    | -    |
| PC_3060                  | P11_B12 | LSIL | 39 A2            | 620,642                      | 492,650                | 2                                                       | 39 A    | 58    | -     | -     | -     | -     | 0.99 | 0.01 | -    | -    | -    | -    |
| PC_3076                  | P11_C1  | LSIL | 39 A2            | 64,626                       | 15,778                 | 4                                                       | 39 A    | 62    | 16    | 89    | -     | -     | 0.77 | 0.20 | 0.02 | -    | -    | -    |
| PC_3084                  | P11_C2  | LSIL | 39 A2            | 611,624                      | 470,370                | 3                                                       | 39 A    | 62    | 89    | -     | -     | -     | 0.77 | 0.20 | 0.02 | -    | -    | -    |
| PC_3005                  | P11_C3  | LSIL | 53 A1*           | 82,078                       | 20,962                 | 5                                                       | 16 A2   | 39    | 43    | 84    | 66    | -     | 0.47 | 0.36 | 0.14 | 0.02 | 0.01 | -    |
| PC_3013                  | P11_C4  | LSIL | 39 A2            | 608,524                      | 459,216                | 4                                                       | 39 A    | 43    | 84    | 81    | -     | -     | 0.69 | 0.27 | 0.03 | 0.01 | -    | -    |

|         |         |      |               |         |         |   |             |    |    |    |    |    |      |      |      |      |      |      |
|---------|---------|------|---------------|---------|---------|---|-------------|----|----|----|----|----|------|------|------|------|------|------|
| PC_3029 | P11_C5  | LSIL | 66 A1         | 201,624 | 73,564  | 3 | 66 A1       | 16 | 54 | -  | -  | -  | 0.96 | 0.02 | 0.01 | -    | -    | -    |
| PC_3061 | P11_C6  | LSIL | 16 C1         | 175,128 | 96,092  | 4 | 16 C1       | 52 | 89 | 56 | -  | -  | 0.96 | 0.02 | 0.01 | 0.01 | -    | -    |
| PC_3069 | P11_C7  | LSIL | 52 A1         | 106,440 | 50,024  | 5 | 52 A1       | 81 | 16 | 54 | 35 | -  | 0.87 | 0.04 | 0.04 | 0.04 | 0.01 | -    |
| PC_3085 | P11_C8  | LSIL | 54 A1         | 172,584 | 107,672 | 4 | 54 A1       | 35 | 74 | 39 | -  | -  | 0.96 | 0.02 | 0.01 | 0.01 | -    | -    |
| PC_2998 | P11_C9  | LSIL | 35 A2         | 253,604 | 168,400 | 4 | 35 A1,2     | 39 | 43 | 16 | -  | -  | 0.93 | 0.04 | 0.02 | 0.01 | -    | -    |
| PC_3006 | P11_C10 | LSIL | 16 A2         | 201,574 | 116,266 | 1 | 16 A1,2     | -  | -  | -  | -  | -  | 1.00 | -    | -    | -    | -    | -    |
| PC_3014 | P11_C11 | LSIL | <b>53 A1*</b> | 132,216 | 13,684  | 4 | <b>39 A</b> | 16 | 62 | 89 | -  | -  | 0.66 | 0.16 | 0.16 | 0.02 | -    | -    |
| PC_3030 | P11_C12 | LSIL | 16 A1         | 300,230 | 207,512 | 1 | 16 A1       | -  | -  | -  | -  | -  | 1.00 | -    | -    | -    | -    | -    |
| PC_3038 | P11_D1  | LSIL | 91            | 102,316 | 29,464  | 6 | 91          | 51 | 82 | 90 | 84 | 39 | 0.75 | 0.13 | 0.06 | 0.04 | 0.01 | 0.01 |
| PC_3046 | P11_D2  | LSIL | 84            | 132,618 | 58,194  | 6 | 84          | 90 | 62 | 31 | 30 | 68 | 0.69 | 0.18 | 0.08 | 0.02 | 0.01 | 0.01 |
| PC_3062 | P11_D3  | LSIL | 51 A4         | 148,572 | 41,620  | 3 | 51 A4       | 39 | 67 | -  | -  | -  | 0.96 | 0.03 | 0.01 | -    | -    | -    |
| PC_3086 | P11_D4  | LSIL | <b>35 A2</b>  | 160,108 | 101,614 | 3 | <b>39 A</b> | 67 | 35 | -  | -  | -  | 0.56 | 0.29 | 0.15 | -    | -    | -    |
| PC_2999 | P11_D5  | LSIL | 39 A2         | 517,018 | 351,454 | 3 | 39 A        | 67 | 35 | -  | -  | -  | 0.62 | 0.33 | 0.05 | -    | -    | -    |
| PC_3007 | P11_D6  | LSIL | 40            | 243,734 | 46,454  | 2 | 40          | 39 | -  | -  | -  | -  | 0.88 | 0.12 | -    | -    | -    | -    |
| PC_3023 | P11_D7  | LSIL | 39 A2         | 740,600 | 525,878 | 3 | 39 A        | 56 | 43 | -  | -  | -  | 0.98 | 0.01 | 0.01 | -    | -    | -    |
| PC_3031 | P11_D8  | LSIL | 58 A2         | 161,618 | 90,066  | 3 | 58 A2       | 52 | 81 | -  | -  | -  | 0.72 | 0.25 | 0.03 | -    | -    | -    |
| PC_3039 | P11_D9  | LSIL | 81            | 313,654 | 231,320 | 2 | 81          | 43 | -  | -  | -  | -  | 0.97 | 0.03 | -    | -    | -    | -    |
| PC_3079 | P11_D10 | LSIL | 43            | 603,936 | 461,732 | 1 | 43          | -  | -  | -  | -  | -  | 1.00 | -    | -    | -    | -    | -    |
| PC_3000 | P11_D11 | LSIL | 51 A3         | 133,102 | 16,160  | 3 | 51 A1       | 39 | 16 | -  | -  | -  | 0.91 | 0.06 | 0.02 | -    | -    | -    |
| PC_3024 | P11_D12 | LSIL | 39 A2         | 143,500 | 51,696  | 3 | 39 A        | 16 | 43 | -  | -  | -  | 0.75 | 0.24 | 0.01 | -    | -    | -    |
| PC_3040 | P11_E1  | LSIL | <b>74</b>     | 154,566 | 13,726  | 4 | <b>39 A</b> | 44 | 74 | 16 | -  | -  | 0.55 | 0.23 | 0.22 | 0.01 | -    | -    |
| PC_3048 | P11_E2  | LSIL | 39 A2         | 795,470 | 614,336 | 1 | 39 A        | -  | -  | -  | -  | -  | 1.00 | -    | -    | -    | -    | -    |
| PC_3064 | P11_E3  | LSIL | 39 A2         | 112,554 | 27,900  | 4 | 39 A        | 51 | 52 | 16 | -  | -  | 0.95 | 0.02 | 0.02 | 0.01 | -    | -    |
| PC_3072 | P11_E4  | LSIL | 51 B2         | 176,666 | 27,338  | 3 | 51 B2       | 40 | 16 | -  | -  | -  | 0.95 | 0.03 | 0.02 | -    | -    | -    |
| PC_3001 | P11_E5  | LSIL | 40            | 305,320 | 196,398 | 3 | 40          | 51 | 43 | -  | -  | -  | 0.64 | 0.35 | 0.01 | -    | -    | -    |
| PC_3009 | P11_E6  | LSIL | 16 C1         | 243,784 | 189,034 | 2 | 16 C1       | 6  | -  | -  | -  | -  | 0.88 | 0.12 | -    | -    | -    | -    |
| PC_3025 | P11_E7  | LSIL | 67 A2         | 140,348 | 29,552  | 3 | 67 A2       | 16 | 51 | -  | -  | -  | 0.75 | 0.22 | 0.03 | -    | -    | -    |
| PC_3049 | P11_E8  | LSIL | 51 A          | 301,144 | 100,922 | 2 | 51 A4       | 56 | -  | -  | -  | -  | 0.97 | 0.03 | -    | -    | -    | -    |
| PC_3057 | P11_E9  | LSIL | 54 A1         | 60,022  | 9,190   | 3 | 54 A1       | 16 | 53 | -  | -  | -  | 0.74 | 0.25 | 0.01 | -    | -    | -    |
| PC_3073 | P11_E10 | LSIL | 16 A2         | 361,292 | 264,282 | 1 | 16 A1,2     | -  | -  | -  | -  | -  | 1.00 | -    | -    | -    | -    | -    |
| PC_3081 | P11_E11 | LSIL | 51 A3         | 41,084  | 10,078  | 3 | 51 A1       | 39 | 43 | -  | -  | -  | 0.97 | 0.02 | 0.01 | -    | -    | -    |
| PC_2610 | P11_E12 | LSIL | 39 A2         | 183,508 | 48,624  | 1 | 39 A        | -  | -  | -  | -  | -  | 1.00 | -    | -    | -    | -    | -    |
| PC_2642 | P11_F1  | LSIL | 39 A2         | 265,374 | 138,400 | 3 | 39 A        | 16 | 18 | -  | -  | -  | 0.93 | 0.06 | 0.01 | -    | -    | -    |
| PC_2690 | P11_F3  | LSIL | 43            | 440,606 | 331,194 | 4 | 43          | 66 | 18 | 16 | -  | -  | 0.77 | 0.14 | 0.07 | 0.02 | -    | -    |

|         |         |      |       |         |         |   |         |    |    |    |    |   |      |      |      |      |      |   |
|---------|---------|------|-------|---------|---------|---|---------|----|----|----|----|---|------|------|------|------|------|---|
| PC_2698 | P11_F4  | LSIL | 39 A2 | 449,646 | 341,468 | 1 | 39 A    | -  | -  | -  | -  | - | 1.00 | -    | -    | -    | -    | - |
| PC_2611 | P11_F5  | LSIL | 84    | 759,680 | 146,418 | 1 | 84      | -  | -  | -  | -  | - | 1.00 | -    | -    | -    | -    | - |
| PC_2651 | P11_F6  | LSIL | 35 A1 | 673,276 | 76,172  | 2 | 35 A1   | 39 | -  | -  | -  | - | 0.74 | 0.26 | -    | -    | -    | - |
| PC_2659 | P11_F7  | LSIL | 62    | 308,150 | 36,790  | 1 | 62      | -  | -  | -  | -  | - | 1.00 | -    | -    | -    | -    | - |
| PC_2675 | P11_F8  | LSIL | 68 E1 | 582,066 | 57,072  | 2 | 68      | 16 | -  | -  | -  | - | 0.98 | 0.02 | -    | -    | -    | - |
| PC_2683 | P11_F9  | LSIL | 62    | 504,304 | 100,586 | 2 | 62      | 56 | -  | -  | -  | - | 0.92 | 0.08 | -    | -    | -    | - |
| PC_2612 | P11_F10 | LSIL | 54 A1 | 81,752  | 18,626  | 3 | 54 A1   | 39 | 81 | -  | -  | - | 0.90 | 0.09 | 0.01 | -    | -    | - |
| PC_2620 | P11_F11 | LSIL | 16 A1 | 429,260 | 337,404 | 2 | 16 A1   | 39 | -  | -  | -  | - | 0.89 | 0.11 | -    | -    | -    | - |
| PC_2652 | P11_F12 | LSIL | 18 A1 | 176,334 | 23,824  | 2 | 18 A1   | 39 | -  | -  | -  | - | 0.93 | 0.07 | -    | -    | -    | - |
| PC_2676 | P11_G1  | LSIL | 40    | 307,624 | 48,504  | 5 | 40      | 44 | 39 | 43 | 53 | - | 0.56 | 0.38 | 0.03 | 0.01 | 0.01 | - |
| PC_2684 | P11_G2  | LSIL | 58 A3 | 76,416  | 25,226  | 2 | 58 A2   | 44 | -  | -  | -  | - | 0.60 | 0.40 | -    | -    | -    | - |
| PC_2692 | P11_G3  | LSIL | 43    | 294,944 | 54,114  | 3 | 43      | 58 | 44 | -  | -  | - | 0.84 | 0.09 | 0.07 | -    | -    | - |
| PC_2700 | P11_G4  | LSIL | 39 A2 | 351,682 | 279,162 | 2 | 39 A    | 58 | -  | -  | -  | - | 0.98 | 0.02 | -    | -    | -    | - |
| PC_2613 | P11_G5  | LSIL | 54 A1 | 65,182  | 4,936   | 2 | 54 A1   | 39 | -  | -  | -  | - | 0.99 | 0.01 | -    | -    | -    | - |
| PC_2621 | P11_G6  | LSIL | 62    | 129,820 | 24,382  | 5 | 62      | 51 | 90 | 84 | 83 | - | 0.46 | 0.41 | 0.06 | 0.06 | 0.01 | - |
| PC_2637 | P11_G7  | LSIL | 52 A1 | 86,988  | 40,658  | 1 | 52 A1   | -  | -  | -  | -  | - | 1.00 | -    | -    | -    | -    | - |
| PC_2661 | P11_G8  | LSIL | 51 A4 | 43,236  | 17,496  | 2 | 51 A1   | 84 | -  | -  | -  | - | 0.88 | 0.12 | -    | -    | -    | - |
| PC_2669 | P11_G9  | LSIL | 81    | 108,428 | 64,810  | 2 | 81      | 66 | -  | -  | -  | - | 0.59 | 0.41 | -    | -    | -    | - |
| PC_2677 | P11_G10 | LSIL | 82 A2 | 106,552 | 33,860  | 2 | 82 A2   | 84 | -  | -  | -  | - | 0.99 | 0.01 | -    | -    | -    | - |
| PC_2685 | P11_G11 | LSIL | 91    | 336,892 | 45,024  | 1 | 91      | -  | -  | -  | -  | - | 1.00 | -    | -    | -    | -    | - |
| PC_2693 | P11_G12 | LSIL | 43    | 538,632 | 391,228 | 1 | 43      | -  | -  | -  | -  | - | 1.00 | -    | -    | -    | -    | - |
| PC_2614 | P11_H1  | LSIL | 39 A2 | 614,046 | 241,416 | 1 | 39 A    | -  | -  | -  | -  | - | 1.00 | -    | -    | -    | -    | - |
| PC_2678 | P11_H2  | LSIL | 52 A1 | 175,324 | 80,180  | 3 | 52 A1   | 58 | 81 | -  | -  | - | 0.89 | 0.10 | 0.01 | -    | -    | - |
| PC_2686 | P11_H3  | LSIL | 16 A2 | 417,468 | 194,648 | 3 | 16 A2   | 52 | 58 | -  | -  | - | 0.76 | 0.22 | 0.02 | -    | -    | - |
| PC_2702 | P11_H4  | LSIL | 39 A2 | 615,566 | 404,610 | 1 | 39 A    | -  | -  | -  | -  | - | 1.00 | -    | -    | -    | -    | - |
| PC_2615 | P11_H5  | LSIL | 66 B2 | 87,348  | 38,712  | 1 | 66 B2   | -  | -  | -  | -  | - | 1.00 | -    | -    | -    | -    | - |
| PC_2655 | P11_H6  | LSIL | 39 A2 | 87,386  | 21,386  | 4 | 39 A    | 84 | 44 | 74 | -  | - | 0.70 | 0.23 | 0.05 | 0.03 | -    | - |
| PC_2663 | P11_H7  | LSIL | 35 A2 | 166,216 | 61,464  | 1 | 35 A1,2 | -  | -  | -  | -  | - | 1.00 | -    | -    | -    | -    | - |
| PC_2695 | P11_H8  | LSIL | 39 A2 | 556,854 | 468,962 | 1 | 39 A    | -  | -  | -  | -  | - | 1.00 | -    | -    | -    | -    | - |
| PC_2624 | P11_H9  | LSIL | 39 A2 | 606,788 | 449,354 | 1 | 39 A    | -  | -  | -  | -  | - | 1.00 | -    | -    | -    | -    | - |
| PC_2664 | P11_H10 | LSIL | 16 A4 | 196,816 | 131,420 | 2 | 16 A1   | 39 | -  | -  | -  | - | 0.68 | 0.32 | -    | -    | -    | - |
| PC_2680 | P11_H11 | LSIL | 6 B1  | 382,046 | 62,782  | 1 | 6 B1    | -  | -  | -  | -  | - | 1.00 | -    | -    | -    | -    | - |
| PC_2696 | P11_H12 | LSIL | 39 A2 | 406,312 | 267,566 | 1 | 39 A    | -  | -  | -  | -  | - | 1.00 | -    | -    | -    | -    | - |
| PC_3101 | P9_E6   | HSIL | 16 A1 | 276,904 | 202,426 | 1 | 16 A1   | -  | -  | -  | -  | - | 1.00 | -    | -    | -    | -    | - |

|         |         |      |        |         |         |   |         |    |    |    |   |   |      |      |      |      |   |   |
|---------|---------|------|--------|---------|---------|---|---------|----|----|----|---|---|------|------|------|------|---|---|
| PC_3109 | P9_E7   | HSIL | 16 A1  | 257,900 | 182,236 | 1 | 16 A1   | -  | -  | -  | - | - | 1.00 | -    | -    | -    | - | - |
| PC_3102 | P9_E10  | HSIL | 51 A4  | 111,284 | 19,942  | 4 | 51 A4   | 39 | 52 | 16 | - | - | 0.91 | 0.05 | 0.03 | 0.01 | - | - |
| PC_3110 | P9_E11  | HSIL | 39 A2  | 290,156 | 202,112 | 1 | 39 A    | -  | -  | -  | - | - | 1.00 | -    | -    | -    | - | - |
| PC_3142 | P9_F1   | HSIL | 16 A1  | 287,112 | 121,304 | 1 | 16 A1   | -  | -  | -  | - | - | 1.00 | -    | -    | -    | - | - |
| PC_3103 | P9_F2   | HSIL | 16 A1  | 229,842 | 119,434 | 1 | 16 A1   | -  | -  | -  | - | - | 1.00 | -    | -    | -    | - | - |
| PC_3111 | P9_F3   | HSIL | 16 A1  | 357,738 | 139,506 | 1 | 16 A1   | -  | -  | -  | - | - | 1.00 | -    | -    | -    | - | - |
| PC_3119 | P9_F4   | HSIL | 16 A1  | 319,146 | 128,092 | 1 | 16 A1   | -  | -  | -  | - | - | 1.00 | -    | -    | -    | - | - |
| PC_3127 | P9_F5   | HSIL | 33 A1  | 178,144 | 67,688  | 1 | 33 A1,2 | -  | -  | -  | - | - | 1.00 | -    | -    | -    | - | - |
| PC_3135 | P9_F6   | HSIL | 31 B2  | 208,128 | 62,228  | 1 | 31 B1,2 | -  | -  | -  | - | - | 1.00 | -    | -    | -    | - | - |
| PC_3143 | P9_F7   | HSIL | 58 A2  | 191,080 | 29,722  | 1 | 58 A2   | -  | -  | -  | - | - | 1.00 | -    | -    | -    | - | - |
| PC_3104 | P9_F8   | HSIL | 39 A2  | 184,298 | 32,962  | 4 | 39 A    | 18 | 51 | 16 | - | - | 0.95 | 0.03 | 0.01 | 0.01 | - | - |
| PC_3112 | P9_F9   | HSIL | NA     | 161,424 | 9,116   | 3 | 35 A1,2 | 16 | 18 | -  | - | - | 0.94 | 0.04 | 0.02 | -    | - | - |
| PC_3120 | P9_F10  | HSIL | 16 A1  | 251,164 | 136,528 | 1 | 16 A1   | -  | -  | -  | - | - | 1.00 | -    | -    | -    | - | - |
| PC_3144 | P9_F12  | HSIL | 18 A1  | 234,778 | 59,404  | 2 | 18 A1   | 58 | -  | -  | - | - | 0.84 | 0.16 | -    | -    | - | - |
| PC_3121 | P9_G1   | HSIL | 51 A2  | 209,376 | 93,372  | 1 | 51 A1   | -  | -  | -  | - | - | 1.00 | -    | -    | -    | - | - |
| PC_3129 | P9_G2   | HSIL | 16 A2  | 713,672 | 545,054 | 1 | 16 A1,2 | -  | -  | -  | - | - | 1.00 | -    | -    | -    | - | - |
| PC_3137 | P9_G3   | HSIL | 16 A1  | 261,602 | 127,236 | 2 | 16 A1   | 62 | -  | -  | - | - | 0.81 | 0.19 | -    | -    | - | - |
| PC_3145 | P9_G4   | HSIL | 58 A2  | 370,106 | 269,016 | 2 | 58 A2   | 54 | -  | -  | - | - | 0.96 | 0.04 | -    | -    | - | - |
| PC_3106 | P9_G5   | HSIL | 58 A3  | 78,976  | 10,948  | 1 | 58 A2   | -  | -  | -  | - | - | 1.00 | -    | -    | -    | - | - |
| PC_3114 | P9_G6   | HSIL | 16 A2  | 242,740 | 147,226 | 1 | 16 A1,2 | -  | -  | -  | - | - | 1.00 | -    | -    | -    | - | - |
| PC_3122 | P9_G7   | HSIL | 52 A1  | 226,378 | 116,138 | 2 | 52 A1   | 66 | -  | -  | - | - | 0.99 | 0.01 | -    | -    | - | - |
| PC_3146 | P9_G8   | HSIL | 16 A2  | 540,442 | 423,124 | 1 | 16 A1,2 | -  | -  | -  | - | - | 1.00 | -    | -    | -    | - | - |
| PC_3107 | P9_G9   | HSIL | 16 A2  | 471,444 | 349,684 | 3 | 16 A1,2 | 30 | 62 | -  | - | - | 0.93 | 0.06 | 0.01 | -    | - | - |
| PC_3123 | P9_G10  | HSIL | 31 C3  | 220,708 | 146,006 | 1 | 31 C1,3 | -  | -  | -  | - | - | 1.00 | -    | -    | -    | - | - |
| PC_3131 | P9_G12  | HSIL | 62     | 164,512 | 13,514  | 4 | 52 A1   | 82 | 16 | 59 | - | - | 0.96 | 0.02 | 0.01 | 0.01 | - | - |
| PC_3140 | P9_H4   | HSIL | 16 A1  | 317,592 | 188,426 | 1 | 16 A1   | -  | -  | -  | - | - | 1.00 | -    | -    | -    | - | - |
| PC_3148 | P9_H5   | HSIL | 16 A2  | 554,998 | 406,296 | 2 | 16 A1,2 | 18 | -  | -  | - | - | 0.61 | 0.39 | -    | -    | - | - |
| PC_3125 | P19_F10 | HSIL | 16 C1  | 182,394 | 116,072 | 1 | 16 C1   | -  | -  | -  | - | - | 1.00 | -    | -    | -    | - | - |
| PC_1278 | P20_C12 | HSIL | 16 A4* | 55,922  | 33,290  | 2 | 16 A1,2 | 39 | -  | -  | - | - | 0.99 | 0.01 | -    | -    | - | - |
| PC_3149 | P25_A7  | HSIL | 58 B2* | 90,408  | 37,374  | 3 | 58 B2   | 39 | 16 | -  | - | - | 0.73 | 0.22 | 0.05 | -    | - | - |
| PC_3175 | P25_A9  | HSIL | 16 C1  | 429,950 | 341,420 | 1 | 16 C1   | -  | -  | -  | - | - | 1.00 | -    | -    | -    | - | - |
| PC_3187 | P25_A10 | HSIL | 16 A4* | 198,666 | 140,648 | 2 | 16 A1   | 35 | -  | -  | - | - | 0.99 | 0.01 | -    | -    | - | - |
| PC_3172 | P25_A11 | HSIL | 16 A4* | 97,068  | 61,986  | 3 | 35 A1,2 | 39 | 16 | -  | - | - | 0.98 | 0.02 | 0.01 | -    | - | - |
| PC_3150 | P25_B7  | HSIL | 61*    | 53,576  | 6,394   | 3 | 39 A    | 16 | 58 | -  | - | - | 0.86 | 0.13 | 0.01 | -    | - | - |

|         |         |      |            |         |         |   |                |    |    |    |    |   |      |      |      |      |      |   |
|---------|---------|------|------------|---------|---------|---|----------------|----|----|----|----|---|------|------|------|------|------|---|
| PC_3163 | P25_B8  | HSIL | 16 A4      | 83,768  | 34,466  | 1 | 16 A1          | -  | -  | -  | -  | - | 1.00 | -    | -    | -    | -    | - |
| PC_3178 | P25_B9  | HSIL | 16 A1      | 122,278 | 92,284  | 2 | 16 A1          | 44 | -  | -  | -  | - | 0.99 | 0.01 | -    | -    | -    | - |
| PC_3153 | P25_C7  | HSIL | 58 A2      | 53,648  | 14,764  | 3 | 58 A2          | 52 | 16 | -  | -  | - | 0.82 | 0.09 | 0.09 | -    | -    | - |
| PC_3164 | P25_C8  | HSIL | 16 C1      | 119,132 | 94,270  | 1 | 16 C1          | -  | -  | -  | -  | - | 1.00 | -    | -    | -    | -    | - |
| PC_3179 | P25_C9  | HSIL | 73 A1*     | 59,262  | 35,728  | 2 | 73 A2          | 16 | -  | -  | -  | - | 0.88 | 0.12 | -    | -    | -    | - |
| PC_3190 | P25_C10 | HSIL | 16 A4      | 269,908 | 212,336 | 1 | 16 A1          | -  | -  | -  | -  | - | 1.00 | -    | -    | -    | -    | - |
| PC_3154 | P25_D7  | HSIL | 35 A2      | 155,558 | 71,634  | 1 | 35 A1,2        | -  | -  | -  | -  | - | 1.00 | -    | -    | -    | -    | - |
| PC_3167 | P25_D8  | HSIL | 35 A2      | 37,264  | 16,864  | 2 | 36 A1,2        | 16 | -  | -  | -  | - | 0.95 | 0.05 | -    | -    | -    | - |
| PC_3180 | P25_D9  | HSIL | 16 A4*     | 122,100 | 86,816  | 3 | 16 A1,2        | 44 | 74 | -  | -  | - | 0.98 | 0.01 | 0.01 | -    | -    | - |
| PC_3191 | P25_D10 | HSIL | 16 A4*     | 570,044 | 348,482 | 5 | 16 A1,2        | 44 | 74 | 62 | 54 | - | 0.67 | 0.18 | 0.13 | 0.01 | 0.01 | - |
| PC_3155 | P25_E7  | HSIL | 39 A1*     | 367,438 | 308,654 | 2 | 39 A1          | 52 | -  | -  | -  | - | 0.95 | 0.05 | -    | -    | -    | - |
| PC_3168 | P25_E8  | HSIL | 16 A2      | 249,124 | 181,846 | 2 | 16 A2          | 58 | -  | -  | -  | - | 0.67 | 0.33 | -    | -    | -    | - |
| PC_3181 | P25_E9  | HSIL | 16 A4*     | 225,558 | 157,564 | 2 | 16 A1          | 68 | -  | -  | -  | - | 0.99 | 0.01 | -    | -    | -    | - |
| PC_3192 | P25_E10 | HSIL | 33 A2      | 238,546 | 123,548 | 2 | 33 A2          | 54 | -  | -  | -  | - | 0.99 | 0.01 | -    | -    | -    | - |
| PC_3169 | P25_F8  | HSIL | 16 A1      | 119,918 | 77,584  | 1 | 16 A1          | -  | -  | -  | -  | - | 1.00 | -    | -    | -    | -    | - |
| PC_3182 | P25_F9  | HSIL | 39 A2      | 139,590 | 97,146  | 2 | 39 A           | 51 | -  | -  | -  | - | 0.99 | 0.01 | -    | -    | -    | - |
| PC_3193 | P25_F10 | HSIL | 16 A1      | 430,734 | 368,762 | 1 | 16 A1          | -  | -  | -  | -  | - | 1.00 | -    | -    | -    | -    | - |
| PC_3157 | P25_G7  | HSIL | 16 A1      | 211,808 | 165,168 | 1 | 16 A1          | -  | -  | -  | -  | - | 1.00 | -    | -    | -    | -    | - |
| PC_3173 | P25_G8  | HSIL | 35 A2      | 319,774 | 204,232 | 1 | 35 A1,2        | -  | -  | -  | -  | - | 1.00 | -    | -    | -    | -    | - |
| PC_3184 | P25_G9  | HSIL | 16 A1      | 219,202 | 138,658 | 2 | 16 A1          | 39 | -  | -  | -  | - | 0.97 | 0.03 | -    | -    | -    | - |
| PC_3195 | P25_G10 | HSIL | 18 A2      | 136,122 | 40,256  | 1 | 18 A3,4        | -  | -  | -  | -  | - | 1.00 | -    | -    | -    | -    | - |
| PC_3158 | P25_H7  | HSIL | 16 A2      | 254,954 | 204,866 | 1 | 16 A2          | -  | -  | -  | -  | - | 1.00 | -    | -    | -    | -    | - |
| PC_3174 | P25_H8  | HSIL | 16 A4*     | 235,520 | 184,872 | 1 | 16 A1          | -  | -  | -  | -  | - | 1.00 | -    | -    | -    | -    | - |
| PC_3186 | P25_H9  | HSIL | <b>83*</b> | 100,474 | 68,930  | 1 | <b>35 A1,2</b> | -  | -  | -  | -  | - | 1.00 | -    | -    | -    | -    | - |
| PC_3171 | P25_H10 | HSIL | 16 A4*     | 104,174 | 68,234  | 1 | 16 A1          | -  | -  | -  | -  | - | 1.00 | -    | -    | -    | -    | - |

E6/E7, HPV E6/E7 gene amplified by PCR; HSIL, high-grade squamous intraepithelial lesion; HPV, human papillomavirus; Info, information; ID, sample identification; L1, HPV L1 gene amplified by PCR; LSIL, low-grade squamous intraepithelial lesion; PCR, polymerase chain reaction; PL, PCR plate number and 96-well plate position; NA, not available/sequenceable; p #n, proportional composition of HPV genotype ranked in descending order by abundance; PAP, Pap smear; Seq, Sanger (dideoxy) sequencing; HPV #n, HPV genotype(s) identified ranked in descending order by abundance. <sup>a</sup>Sample ID, plate number and well position of LSIL (*n* = 95) and HSIL (*n* = 60) cervical cytology samples. <sup>b</sup>HPV genotype determined by BLAST alignment of E6/E7 amplicon/Sanger-based sequences. HPV genotypes are in numerals; variant lineage and sublineage are in alphanumeric values, respectively. For non-sequenceable or interpretable E6/E7 results, HPV L1 sequencing results were used alternatively for genotype determination. These samples (*n* = 16) are indicated by a star (\*). Samples (9/155 samples, 5.81%) with discordant HPV typing results by Sanger sequencing/BLAST and deep sequencing/taxonomic profiling are in bold. <sup>c</sup>Sequence data and HPV genotype composition determined by the Taxonomic Profiling workflow. <sup>d</sup>Total merged and mapped reads statistics generated by the Taxonomic Profiling workflow. <sup>e</sup>HPV genotype(s) determined by taxonomic profiling of amplicon/deep seq-based sequences. HPV genotypes are in numerals; variant lineage and sublineage are in alphanumeric values, respectively. Up to 6 predominant HPV type(s) per sample are tabulated. Only

types meeting qualification (confidence score  $\geq 0.995$ ) and constituting  $\geq 1\%$  of the HPV composition within the sample) are listed. The reported confidence score equates to 1 - *p*-value under the null hypothesis that the reads map at random positions in the database [41]. The corresponding proportional composition are tabulated under p #n. Discordant HPV typing results by Sanger and deep sequencing are highlighted in bold (*n* = 9).

**Table S3.** BLAST results for HPV genotyping by Sanger sequencing.

| Sample Info <sup>a</sup> |      |       |                  |              | BLAST Statistics <sup>b</sup> |                       |                  |             |           |           |               |        |          |         |           |
|--------------------------|------|-------|------------------|--------------|-------------------------------|-----------------------|------------------|-------------|-----------|-----------|---------------|--------|----------|---------|-----------|
| ID (Query)               | PAP  | AMP   | HSP ( <i>n</i> ) | Lowest E-val | Accession (E-val)             | HPV Type <sup>c</sup> | Hit <sup>d</sup> | Total Score | Max Score | Min E-Val | Max Bit Score | Max ID | Max % ID | Max Pos | Max % Pos |
| PC_2994                  | LSIL | E6/E7 | 16               | 0            | HPV39,_A2REF_KC470239         | 39,_A2                | Access seq       | 487         | 487       | 0         | 937.04        | 531    | 93.16    | 531     | 93.16     |
| PC (3002                 | LSIL | E6/E7 | 3                | 0            | HPV35,_A2REF_HQ537727         | 35,_A2                | Access seq       | 540         | 540       | 0         | 1038.94       | 556    | 98.06    | 556     | 98.06     |
| PC_3010                  | LSIL | E6/E7 | 17               | 0            | HPV39,_A2REF_KC470239         | 39,_A2                | Access seq       | 522         | 522       | 0         | 1004.33       | 553    | 94.85    | 553     | 94.85     |
| PC_3018                  | LSIL | E6/E7 | 1                | 0            | HPV91REF                      | 91                    | Access seq       | 521         | 521       | 0         | 1002.41       | 526    | 99.43    | 526     | 99.43     |
| PC_3042                  | LSIL | E6/E7 | 16               | 0            | HPV39,_A2REF_KC470239         | 39,_A2                | Access seq       | 409         | 409       | 0         | 787.07        | 428    | 96.83    | 428     | 96.83     |
| PC_3050                  | LSIL | E6/E7 | 17               | 0            | HPV39,_A2REF_KC470239         | 39,_A2                | Access seq       | 585         | 585       | 0         | 1125.46       | 585    | 100      | 585     | 100       |
| PC_3058                  | LSIL | E6/E7 | 17               | 0            | HPV39,_A2REF_KC470239         | 39,_A2                | Access seq       | 577         | 577       | 0         | 1110.08       | 578    | 99.83    | 578     | 99.83     |
| PC_3066                  | LSIL | E6/E7 | 17               | 0            | HPV39,_A2REF_KC470239         | 39,_A2                | Access seq       | 584         | 584       | 0         | 1123.54       | 585    | 99.83    | 585     | 99.83     |
| PC_3074                  | LSIL | E6/E7 | 8                | 0            | HPV91REF                      | 91                    | Access seq       | 528         | 528       | 0         | 1015.87       | 533    | 99.44    | 533     | 99.44     |
| PC_3082                  | LSIL | L1    | 231              | 0            | HPV66,_B1REF_EF177188         | 66,_B1                | Access seq       | 733         | 733       | 0         | 662.22        | 370    | 99.2     | 370     | 99.2      |
| PC_3003                  | LSIL | E6/E7 | 9                | 0            | HPV66,_B1REF_EF177188         | 66,_B1                | Access seq       | 430         | 430       | 0         | 827.44        | 470    | 95.53    | 470     | 95.53     |
| PC_3011                  | LSIL | E6/E7 | 11               | 0            | HPV35,_A2REF_HQ537727         | 35,_A2                | Access seq       | 531         | 531       | 0         | 1021.63       | 554    | 97.71    | 554     | 97.71     |
| PC_3019                  | LSIL | E6/E7 | 11               | 0            | HPV16,_A1REF_EU_PPH16         | 16,_A1                | Access seq       | 550         | 550       | 0         | 1058.17       | 560    | 99.29    | 560     | 99.29     |
| PC_3059                  | LSIL | E6/E7 | 17               | 0            | HPV39,_A2REF_KC470239         | 39,_A2                | Access seq       | 557         | 557       | 0         | 1071.62       | 564    | 99.3     | 564     | 99.3      |
| PC_3067                  | LSIL | E6/E7 | 11               | 0            | HPV16,_A1REF_EU_PPH16         | 16,_A1                | Access seq       | 514         | 514       | 0         | 988.95        | 518    | 99.62    | 518     | 99.62     |
| PC_3075                  | LSIL | E6/E7 | 11               | 0            | HPV16,_A1REF_EU_PPH16         | 16,_A1                | Access seq       | 385         | 385       | 0         | 740.92        | 497    | 90.2     | 497     | 90.2      |
| PC_3083                  | LSIL | E6/E7 | 9                | 0            | HPV58,_C1REF_HQ537774         | 58,_C1                | Access seq       | 544         | 544       | 0         | 1046.63       | 553    | 98.93    | 553     | 98.93     |
| PC_2996                  | LSIL | E6/E7 | 1                | 1.586E-144   | HPV62REF                      | 62                    | Access seq       | 264         | 264       | 1.59E-144 | 508.28        | 303    | 93.52    | 303     | 93.52     |
| PC_3004                  | LSIL | E6/E7 | 17               | 0            | HPV30,_A3REF_KF436844         | 30,_A3                | Access seq       | 545         | 545       | 0         | 1048.55       | 555    | 98.93    | 555     | 98.93     |



|         |      |       |     |             |                           |                   |     |     |           |         |     |       |     |       |
|---------|------|-------|-----|-------------|---------------------------|-------------------|-----|-----|-----------|---------|-----|-------|-----|-------|
| PC_3020 | LSIL | E6/E7 | 5   | 2.1342E-176 | HPV30,_A3REF_KF436844     | 30,_A3 Access seq | 319 | 319 | 2.13E-176 | 614.02  | 439 | 85.91 | 439 | 85.91 |
| PC_3028 | LSIL | E6/E7 | 18  | 0           | HPV51,_B1REF_KF436883     | 51 Access seq     | 557 | 557 | 0         | 1071.62 | 564 | 99.3  | 564 | 99.3  |
| PC_3036 | LSIL | E6/E7 | 11  | 0           | HPV16,_A1REF_EU_PPH16     | 16,_A1 Access seq | 549 | 549 | 0         | 1056.24 | 559 | 98.59 | 559 | 98.59 |
| PC_3044 | LSIL | E6/E7 | 17  | 0           | HPV39,_A2REF_KC470239     | 39,_A2 Access seq | 579 | 579 | 0         | 1113.92 | 586 | 99.83 | 586 | 99.83 |
| PC_3060 | LSIL | E6/E7 | 17  | 0           | HPV39,_A2REF_KC470239     | 39,_A2 Access seq | 583 | 583 | 0         | 1121.61 | 585 | 99.83 | 585 | 99.83 |
| PC_3076 | LSIL | E6/E7 | 7   | 2.274E-117  | HPV39,_A2REF_KC470239     | 39,_A2 Access seq | 217 | 217 | 2.27E-117 | 417.91  | 282 | 88.12 | 282 | 88.12 |
| PC_3084 | LSIL | E6/E7 | 17  | 0           | HPV39,_A2REF_KC470239     | 39,_A2 Access seq | 575 | 575 | 0         | 1106.23 | 585 | 99.32 | 585 | 99.32 |
| PC_3005 | LSIL | L1    | 267 | 5.427E-174  | HPV53,_A1REF_X74482       | 53,_A1 Access seq | 671 | 671 | 5.43E-174 | 606.32  | 340 | 99.13 | 340 | 99.13 |
| PC_3013 | LSIL | E6/E7 | 17  | 0           | HPV39,_A2REF_KC470239     | 39,_A2 Access seq | 567 | 567 | 0         | 1090.85 | 577 | 98.3  | 577 | 98.3  |
| PC_3029 | LSIL | E6/E7 | 9   | 0           | HPV66,_A1REF_HPU31794     | 66,_A1 Access seq | 479 | 479 | 0         | 921.65  | 510 | 95.68 | 510 | 95.68 |
| PC_3061 | LSIL | E6/E7 | 11  | 0           | HPV16,_C1REF_AF2_AF472509 | 16,_C1 Access seq | 563 | 563 | 0         | 1083.16 | 571 | 98.79 | 571 | 98.79 |
| PC_3069 | LSIL | E6/E7 | 8   | 0           | HPV52,_A1REF_X74481       | 52,_A1 Access seq | 446 | 446 | 0         | 858.21  | 486 | 92.75 | 486 | 92.75 |
| PC_3085 | LSIL | E6/E7 | 4   | 0           | HPV54,_A1REF_HPU37488     | 54,_A1 Access seq | 525 | 525 | 0         | 1010.1  | 526 | 99.81 | 526 | 99.81 |
| PC_2998 | LSIL | E6/E7 | 3   | 0           | HPV35,_A2REF_HQ537727     | 35,_A2 Access seq | 539 | 539 | 0         | 1037.02 | 557 | 98.76 | 557 | 98.76 |
| PC_3006 | LSIL | E6/E7 | 11  | 0           | HPV16,_A2REF_EU_AF536179  | 16,_A2 Access seq | 538 | 538 | 0         | 1035.09 | 554 | 98.23 | 554 | 98.23 |
| PC_3014 | LSIL | L1    | 275 | 0           | HPV53,_A1REF_X74482       | 53,_A1 Access seq | 740 | 740 | 0         | 668.53  | 389 | 97.74 | 389 | 97.74 |
| PC_3030 | LSIL | E6/E7 | 11  | 0           | HPV16,_A1REF_EU_PPH16     | 16,_A1 Access seq | 561 | 561 | 0         | 1079.32 | 569 | 99.3  | 569 | 99.3  |
| PC_3038 | LSIL | E6/E7 | 1   | 0           | HPV91REF                  | 91 Access seq     | 362 | 362 | 0         | 696.7   | 414 | 93.24 | 414 | 93.24 |
| PC_3046 | LSIL | E6/E7 | 2   | 0           | HPV84REF                  | 84 Access seq     | 398 | 398 | 0         | 765.92  | 429 | 95.97 | 429 | 95.97 |
| PC_3062 | LSIL | E6/E7 | 18  | 0           | HPV51,_A4REF_KF436875     | 51,_A4 Access seq | 367 | 367 | 0         | 706.31  | 374 | 98.68 | 374 | 98.68 |
| PC_3086 | LSIL | E6/E7 | 3   | 0           | HPV35,_A2REF_HQ537727     | 35,_A2 Access seq | 481 | 481 | 0         | 925.5   | 509 | 95.86 | 509 | 95.86 |
| PC_2999 | LSIL | E6/E7 | 7   | 0           | HPV39,_A2REF_KC470239     | 39,_A2 Access seq | 495 | 495 | 0         | 952.42  | 545 | 93.8  | 545 | 93.8  |
| PC_3007 | LSIL | E6/E7 | 1   | 0           | HPV40REF                  | 40 Access seq     | 344 | 344 | 0         | 662.09  | 397 | 92.76 | 397 | 92.76 |
| PC_3023 | LSIL | E6/E7 | 17  | 0           | HPV39,_A2REF_KC470239     | 39,_A2 Access seq | 586 | 586 | 0         | 1127.38 | 586 | 100   | 586 | 100   |
| PC_3031 | LSIL | E6/E7 | 9   | 0           | HPV58,_A2REF_HQ537752     | 58,_A2 Access seq | 528 | 528 | 0         | 1015.87 | 539 | 98.72 | 539 | 98.72 |
| PC_3039 | LSIL | E6/E7 | 1   | 0           | HPV81REF                  | 81 Access seq     | 514 | 514 | 0         | 988.95  | 536 | 98.89 | 536 | 98.89 |
| PC_3079 | LSIL | E6/E7 | 2   | 0           | HPV43REF                  | 43 Access seq     | 511 | 511 | 0         | 983.18  | 529 | 98.14 | 529 | 98.14 |
| PC_3000 | LSIL | E6/E7 | 18  | 0           | HPV51,_A3REF_KF436873     | 51,_A3 Access seq | 348 | 348 | 0         | 669.78  | 363 | 98.11 | 363 | 98.11 |
| PC_3024 | LSIL | E6/E7 | 17  | 0           | HPV39,_A2REF_KC470239     | 39,_A2 Access seq | 554 | 554 | 0         | 1065.86 | 568 | 98.27 | 568 | 98.27 |
| PC_3040 | LSIL | E6/E7 | 2   | 8.2989E-161 | HPV74REF                  | 74 Access seq     | 292 | 292 | 8.3E-161  | 562.11  | 336 | 93.59 | 336 | 93.59 |

|         |      |       |    |             |                            |                   |      |      |           |         |     |       |     |       |
|---------|------|-------|----|-------------|----------------------------|-------------------|------|------|-----------|---------|-----|-------|-----|-------|
| PC_3048 | LSIL | E6/E7 | 17 | 0           | HPV39,_A2REF_KC470239      | 39,_A2 Access seq | 583  | 583  | 0         | 1121.61 | 584 | 99.83 | 584 | 99.83 |
| PC_3064 | LSIL | E6/E7 | 9  | 0           | HPV39,_A2REF_KC470239      | 39,_A2 Access seq | 436  | 436  | 0         | 838.98  | 475 | 94.43 | 475 | 94.43 |
| PC_3072 | LSIL | E6/E7 | 18 | 0           | HPV51,_B2REF_KF436886      | 51,_B2 Access seq | 356  | 356  | 0         | 685.16  | 383 | 96.47 | 383 | 96.47 |
| PC_3001 | LSIL | E6/E7 | 1  | 0           | HPV40REF                   | 40 Access seq     | 376  | 376  | 0         | 723.62  | 471 | 89.54 | 471 | 89.54 |
| PC_3009 | LSIL | E6/E7 | 11 | 0           | HPV16,_C1REF,_AF2_AF472509 | 16,_C1 Access seq | 556  | 556  | 0         | 1069.7  | 559 | 99.47 | 559 | 99.47 |
| PC_3025 | LSIL | E6/E7 | 13 | 9.9772E-135 | HPV67,_A2REF_HQ537780      | 67,_A2 Access seq | 247  | 247  | 9.98E-135 | 475.59  | 330 | 87.77 | 330 | 87.77 |
| PC_3049 | LSIL | E6/E7 | 18 | 0           | HPV51,_A4REF_KF436875      | 51,_A Access seq  | 454  | 454  | 0         | 873.59  | 502 | 91.77 | 502 | 91.77 |
| PC_3057 | LSIL | E6/E7 | 4  | 0           | HPV54,_A1REF_HPU37488      | 54,_A1 Access seq | 347  | 347  | 0         | 667.86  | 354 | 98.33 | 354 | 98.33 |
| PC_3073 | LSIL | E6/E7 | 11 | 0           | HPV16,_A2REF_EU_AF536179   | 16,_A2 Access seq | 560  | 560  | 0         | 1077.39 | 570 | 99.13 | 570 | 99.13 |
| PC_3081 | LSIL | E6/E7 | 18 | 0           | HPV51,_A3REF_KF436873      | 51,_A3 Access seq | 408  | 408  | 0         | 785.14  | 444 | 92.89 | 444 | 92.89 |
| PC_2610 | LSIL | E6/E7 | 58 | 0           | HPV39,_A2REF_KC470239      | 39,_A2 Access seq | 1066 | 1066 | 0         | 962.48  | 562 | 96.73 | 562 | 96.73 |
| PC_2642 | LSIL | E6/E7 | 58 | 0           | HPV39,_A2REF_KC470239      | 39,_A2 Access seq | 1138 | 1138 | 0         | 1027.4  | 579 | 98.81 | 579 | 98.81 |
| PC_2690 | LSIL | E6/E7 | 58 | 0           | HPV43REF                   | 43 Access seq     | 974  | 974  | 0         | 879.53  | 519 | 97.01 | 519 | 97.01 |
| PC_2698 | LSIL | E6/E7 | 58 | 0           | HPV39,_A2REF_KC470239      | 39,_A2 Access seq | 1174 | 1174 | 0         | 1059.86 | 587 | 100   | 587 | 100   |
| PC_2611 | LSIL | E6/E7 | 47 | 0           | HPV84REF                   | 84 Access seq     | 894  | 894  | 0         | 807.39  | 497 | 95.21 | 497 | 95.21 |
| PC_2651 | LSIL | E6/E7 | 60 | 0           | HPV35,_A1REF_X74477        | 35,_A1 Access seq | 1134 | 1134 | 0         | 1023.8  | 578 | 98.97 | 578 | 98.97 |
| PC_2659 | LSIL | E6/E7 | 57 | 0           | HPV62REF                   | 62 Access seq     | 964  | 964  | 0         | 870.51  | 506 | 97.12 | 506 | 97.12 |
| PC_2675 | LSIL | E6/E7 | 59 | 0           | HPV68,_E1REF_KC470277      | 68,_E1 Access seq | 1154 | 1154 | 0         | 1041.83 | 587 | 98.82 | 587 | 98.82 |
| PC_2683 | LSIL | E6/E7 | 64 | 0           | HPV62REF                   | 62 Access seq     | 902  | 902  | 0         | 814.61  | 495 | 95.01 | 495 | 95.01 |
| PC_2612 | LSIL | E6/E7 | 54 | 0           | HPV54,_A1REF_HPU37488      | 54,_A1 Access seq | 1028 | 1028 | 0         | 928.22  | 531 | 98.15 | 531 | 98.15 |
| PC_2620 | LSIL | E6/E7 | 55 | 0           | HPV16,_A1REF_EU_PPH16      | 16,_A1 Access seq | 1102 | 1102 | 0         | 994.94  | 570 | 97.94 | 570 | 97.94 |
| PC_2652 | LSIL | E6/E7 | 50 | 0           | HPV18,_A1REF_AY262282      | 18,_A1 Access seq | 1160 | 1160 | 0         | 1047.24 | 586 | 99.32 | 586 | 99.32 |
| PC_2676 | LSIL | E6/E7 | 15 | 2.75205E-98 | HPV40REF                   | 40 Access seq     | 392  | 392  | 2.75E-98  | 354.75  | 393 | 75.58 | 393 | 75.58 |
| PC_2684 | LSIL | E6/E7 | 65 | 3.8427E-127 | HPV58,_A3REF_HQ537758      | 58,_A3 Access seq | 528  | 498  | 3.84E-127 | 450.32  | 359 | 82.72 | 359 | 82.72 |
| PC_2692 | LSIL | E6/E7 | 61 | 0           | HPV43REF                   | 43 Access seq     | 1026 | 1026 | 0         | 926.41  | 529 | 98.14 | 529 | 98.14 |
| PC_2700 | LSIL | E6/E7 | 58 | 0           | HPV39,_A2REF_KC470239      | 39,_A2 Access seq | 1174 | 1174 | 0         | 1059.86 | 587 | 100   | 587 | 100   |
| PC_2613 | LSIL | E6/E7 | 54 | 0           | HPV54,_A1REF_HPU37488      | 54,_A1 Access seq | 920  | 920  | 0         | 830.84  | 475 | 97.74 | 475 | 97.74 |
| PC_2621 | LSIL | E6/E7 | 76 | 1.6181E-113 | HPV62REF                   | 62 Access seq     | 448  | 448  | 1.62E-113 | 405.24  | 374 | 79.24 | 374 | 79.24 |
| PC_2637 | LSIL | E6/E7 | 51 | 0           | HPV52,_A1REF_X74481        | 52,_A1 Access seq | 1108 | 1108 | 0         | 1000.35 | 557 | 99.64 | 557 | 99.64 |
| PC_2661 | LSIL | E6/E7 | 54 | 0           | HPV51,_A4REF_KF436875      | 51,_A4 Access seq | 944  | 944  | 0         | 852.48  | 523 | 95.26 | 523 | 95.26 |

|         |      |       |    |   |                               |        |            |      |      |    |         |     |       |     |       |
|---------|------|-------|----|---|-------------------------------|--------|------------|------|------|----|---------|-----|-------|-----|-------|
| PC_2669 | LSIL | E6/E7 | 60 | 0 | HPV81REF                      | 81     | Access seq | 806  | 806  | 0  | 728.04  | 476 | 90.49 | 476 | 90.49 |
| PC_2677 | LSIL | E6/E7 | 50 | 0 | HPV82,_A2REF_KF436787         | 82,_A2 | Access seq | 1070 | 1070 | 0  | 966.09  | 546 | 98.56 | 546 | 98.56 |
| PC_2685 | LSIL | E6/E7 | 57 | 0 | HPV91REF                      | 91     | Access seq | 888  | 888  | 0  | 801.98  | 460 | 97.46 | 460 | 97.46 |
| PC_2693 | LSIL | E6/E7 | 61 | 0 | HPV43REF                      | 43     | Access seq | 1034 | 1034 | 0  | 933.63  | 531 | 98.52 | 531 | 98.52 |
| PC_2614 | LSIL | E6/E7 | 58 | 0 | HPV39,_A2REF_KC470239         | 39,_A2 | Access seq | 1106 | 1106 | 0  | 998.55  | 570 | 97.77 | 570 | 97.77 |
| PC_2678 | LSIL | E6/E7 | 51 | 0 | HPV52,_A1REF_X74481           | 52,_A1 | Access seq | 1010 | 1010 | 0  | 911.99  | 525 | 97.22 | 525 | 97.22 |
| PC_2686 | LSIL | E6/E7 | 55 | 0 | HPV16,_A2REF_EU_AF536179      | 16,_A2 | Access seq | 1100 | 1100 | 0  | 993.14  | 569 | 98.44 | 569 | 98.44 |
| PC_2702 | LSIL | E6/E7 | 58 | 0 | HPV39,_A2REF_KC470239         | 39,_A2 | Access seq | 1170 | 1170 | 0  | 1056.26 | 593 | 99.16 | 593 | 99.16 |
| PC_2615 | LSIL | E6/E7 | 50 | 0 | HPV66,_B2REF_EF177187         | 66,_B2 | Access seq | 1046 | 1046 | 0  | 944.45  | 548 | 97.16 | 548 | 97.16 |
| PC_2655 | LSIL | E6/E7 | 65 | 0 | HPV39,_A2REF_KC470239         | 39,_A2 | Access seq | 820  | 820  | 0  | 740.67  | 494 | 88.69 | 494 | 88.69 |
| PC_2663 | LSIL | E6/E7 | 60 | 0 | HPV35,_A2REF_HQ537727         | 35,_A2 | Access seq | 1116 | 1116 | 0  | 1007.57 | 569 | 98.61 | 569 | 98.61 |
| PC_2695 | LSIL | E6/E7 | 58 | 0 | HPV39,_A2REF_KC470239         | 39,_A2 | Access seq | 1170 | 1170 | 0  | 1056.26 | 585 | 100   | 585 | 100   |
| PC_2624 | LSIL | E6/E7 | 58 | 0 | HPV39,_A2REF_KC470239         | 39,_A2 | Access seq | 1170 | 1170 | 0  | 1056.26 | 585 | 100   | 585 | 100   |
| PC_2664 | LSIL | E6/E7 | 52 | 0 | HPV16,_A4REF_ASIA_EA_AF534061 | 16,_A4 | Access seq | 728  | 728  | 0  | 657.71  | 482 | 85.46 | 482 | 85.46 |
| PC_2680 | LSIL | E6/E7 | 51 | 0 | HPV_6,_B1REF_FR751337         | 6,_B1  | Access seq | 984  | 984  | 0  | 888.54  | 510 | 97.51 | 510 | 97.51 |
| PC_2696 | LSIL | E6/E7 | 58 | 0 | HPV39,_A2REF_KC470239         | 39,_A2 | Access seq | 1170 | 1170 | 0  | 1056.26 | 593 | 99.16 | 593 | 99.16 |
| PC_3101 | HSIL | E6/E7 | 11 | 0 | HPV16,_A1REF_EU_PPH16         | 16,_A1 | Access seq | 562  | 562  | 0  | 1081.24 | 574 | 99.31 | 574 | 99.31 |
| PC_3109 | HSIL | E6/E7 | 11 | 0 | HPV16,_A1REF_EU_PPH16         | 16,_A1 | Access seq | 537  | 537  | 0  | 1033.17 | 551 | 99.1  | 551 | 99.1  |
| PC_3102 | HSIL | E6/E7 | 18 | 0 | HPV51,_A4REF_KF436875         | 51,_A4 | Access seq | 352  | 352  | 0  | 677.47  | 450 | 87.89 | 450 | 87.89 |
| PC_3110 | HSIL | E6/E7 | 17 | 0 | HPV39,_A2REF_KC470239         | 39,_A2 | Access seq | 587  | 587  | 0  | 1129.31 | 587 | 100   | 587 | 100   |
| PC_3142 | HSIL | E6/E7 | 11 | 0 | HPV16,_A1REF_EU_PPH16         | 16,_A1 | Access seq | 539  | 539  | 0  | 1037.02 | 546 | 99.09 | 546 | 99.09 |
| PC_3103 | HSIL | E6/E7 | 11 | 0 | HPV16,_A1REF_EU_PPH16         | 16,_A1 | Access seq | 545  | 545  | 0  | 1048.55 | 557 | 98.24 | 557 | 98.24 |
| PC_3111 | HSIL | E6/E7 | 11 | 0 | HPV16,_A1REF_EU_PPH16         | 16,_A1 | Access seq | 561  | 561  | 0  | 1079.32 | 565 | 99.65 | 565 | 99.65 |
| PC_3119 | HSIL | E6/E7 | 11 | 0 | HPV16,_A1REF_EU_PPH16         | 16,_A1 | Access seq | 551  | 551  | 0  | 1060.09 | 560 | 98.77 | 560 | 98.77 |
| PC_3127 | HSIL | E6/E7 | 6  | 0 | HPV33,_A1REF_PPH33CG          | 33,_A1 | Access seq | 504  | 504  | 0  | 969.72  | 535 | 96.57 | 535 | 96.57 |
| PC_3135 | HSIL | E6/E7 | 11 | 0 | HPV31,_B2REF_HQ537680         | 31,_B2 | Access seq | 395  | 395  | 0  | 760.15  | 460 | 93.12 | 460 | 93.12 |
| PC_3143 | HSIL | E6/E7 | 9  | 0 | HPV58,_A2REF_HQ537752         | 58,_A2 | Access seq | 362  | 362  | 0  | 696.7   | 376 | 97.66 | 376 | 97.66 |
| PC_3104 | HSIL | E6/E7 | 16 | 0 | HPV39,_A2REF_KC470239         | 39,_A2 | Access seq | 906  | 906  | 0  | 818.21  | 488 | 94.94 | 488 | 94.94 |
| PC_3112 | HSIL | L1    | 0  |   | Not Available                 | NA     | Access seq | NA   | NA   | NA | NA      | NA  | NA    | NA  | NA    |
| PC_3120 | HSIL | E6/E7 | 11 | 0 | HPV16,_A1REF_EU_PPH16         | 16,_A1 | Access seq | 532  | 532  | 0  | 1023.56 | 542 | 98.72 | 542 | 98.72 |
| PC_3144 | HSIL | E6/E7 | 16 | 0 | HPV18,_A1REF_AY262282         | 18,_A1 | Access seq | 449  | 449  | 0  | 863.97  | 473 | 95.36 | 473 | 95.36 |
| PC_3121 | HSIL | E6/E7 | 18 | 0 | HPV51,_A2REF_KF436870         | 51,_A2 | Access seq | 509  | 509  | 0  | 979.34  | 514 | 99.42 | 514 | 99.42 |
| PC_3129 | HSIL | E6/E7 | 11 | 0 | HPV16,_A2REF_EU_AF536179      | 16,_A2 | Access seq | 563  | 563  | 0  | 1083.16 | 574 | 98.8  | 574 | 98.8  |

|         |      |       |     |             |                               |                   |      |      |           |         |     |       |     |       |
|---------|------|-------|-----|-------------|-------------------------------|-------------------|------|------|-----------|---------|-----|-------|-----|-------|
| PC_3137 | HSIL | E6/E7 | 11  | 0           | HPV16,_A1REF_EU_PPH16         | 16,_A1 Access seq | 539  | 539  | 0         | 1037.02 | 553 | 97.88 | 553 | 97.88 |
| PC_3145 | HSIL | E6/E7 | 9   | 0           | HPV58,_A2REF_HQ537752         | 58,_A2 Access seq | 547  | 547  | 0         | 1052.4  | 551 | 99.64 | 551 | 99.64 |
| PC_3106 | HSIL | E6/E7 | 9   | 0           | HPV58,_A3REF_HQ537758         | 58,_A3 Access seq | 900  | 900  | 0         | 812.8   | 502 | 95.08 | 502 | 95.08 |
| PC_3114 | HSIL | E6/E7 | 11  | 0           | HPV16,_A2REF_EU_AF536179      | 16,_A2 Access seq | 1130 | 1130 | 0         | 1020.19 | 574 | 98.8  | 574 | 98.8  |
| PC_3122 | HSIL | E6/E7 | 8   | 0           | HPV52,_A1REF_X74481           | 52,_A1 Access seq | 502  | 502  | 0         | 965.88  | 517 | 98.48 | 517 | 98.48 |
| PC_3146 | HSIL | E6/E7 | 11  | 0           | HPV16,_A2REF_EU_AF536179      | 16,_A2 Access seq | 559  | 559  | 0         | 1075.47 | 569 | 98.96 | 569 | 98.96 |
| PC_3107 | HSIL | E6/E7 | 11  | 0           | HPV16,_A2REF_EU_AF536179      | 16,_A2 Access seq | 1142 | 1142 | 0         | 1031.01 | 577 | 99.14 | 577 | 99.14 |
| PC_3123 | HSIL | E6/E7 | 11  | 0           | HPV31,_C3REF_HQ537685         | 31,_C3 Access seq | 550  | 550  | 0         | 1058.17 | 559 | 99.11 | 559 | 99.11 |
| PC_3131 | HSIL | E6/E7 | 1   | 0           | HPV62REF                      | 62 Access seq     | 492  | 492  | 0         | 946.65  | 515 | 98.28 | 515 | 98.28 |
| PC_3140 | HSIL | E6/E7 | 11  | 0           | HPV16,_A1REF_EU_PPH16         | 16,_A1 Access seq | 552  | 552  | 0         | 1062.01 | 563 | 99.47 | 563 | 99.47 |
| PC_3148 | HSIL | E6/E7 | 11  | 0           | HPV16,_A2REF_EU_AF536179      | 16,_A2 Access seq | 489  | 489  | 0         | 940.88  | 509 | 96.77 | 509 | 96.77 |
| PC_3125 | HSIL | E6/E7 | 11  | 0           | HPV16,_C1REF,_AF2_AF472509    | 16,_C1 Access seq | 566  | 566  | 0         | 1088.93 | 569 | 99.48 | 569 | 99.48 |
| PC_1278 | HSIL | L1    | 273 | 0           | HPV16,_A4REF_ASIA_EA_AF534061 | 16,_A4 Access seq | 814  | 814  | 0         | 735.26  | 407 | 100   | 407 | 100   |
| PC_3149 | HSIL | L1    | 289 | 0           | HPV58,_B2REF_HQ537764         | 58,_B2 Access seq | 767  | 767  | 0         | 692.88  | 394 | 98.5  | 394 | 98.5  |
| PC_3175 | HSIL | E6/E7 | 144 | 0           | HPV16,_C1REF,_AF2_AF472509    | 16,_C1 Access seq | 946  | 946  | 0         | 854.28  | 497 | 96.32 | 497 | 96.32 |
| PC_3187 | HSIL | L1    | 257 | 0           | HPV16,_A4REF_ASIA_EA_AF534061 | 16,_A4 Access seq | 786  | 786  | 0         | 710.01  | 393 | 100   | 393 | 100   |
| PC_3172 | HSIL | L1    | 234 | 6.74034E-61 | HPV16,_A4REF_ASIA_EA_AF534061 | 16,_A4 Access seq | 255  | 255  | 6.74E-61  | 231.22  | 236 | 77.89 | 236 | 77.89 |
| PC_3150 | HSIL | L1    | 304 | 2.7766E-130 | HPV61REF                      | 61 Access seq     | 688  | 510  | 2.78E-130 | 461.14  | 341 | 85.89 | 341 | 85.89 |
| PC_3163 | HSIL | E6/E7 | 116 | 0           | HPV16,_A4REF_ASIA_EA_AF534061 | 16,_A4 Access seq | 742  | 742  | 0         | 670.34  | 427 | 93.03 | 427 | 93.03 |
| PC_3178 | HSIL | E6/E7 | 169 | 0           | HPV16,_A1REF_EU_PPH16         | 16,_A1 Access seq | 1062 | 1062 | 0         | 958.88  | 567 | 96.76 | 567 | 96.76 |
| PC_3153 | HSIL | E6/E7 | 129 | 0           | HPV58,_A2REF_HQ537752         | 58,_A2 Access seq | 794  | 794  | 0         | 717.22  | 467 | 91.93 | 467 | 91.93 |
| PC_3164 | HSIL | E6/E7 | 178 | 0           | HPV16,_C1REF,_AF2_AF472509    | 16,_C1 Access seq | 1044 | 1044 | 0         | 942.64  | 560 | 96.39 | 560 | 96.39 |
| PC_3179 | HSIL | L1    | 269 | 0           | HPV73,_A1REF_X94165           | 73,_A1 Access seq | 728  | 728  | 0         | 657.71  | 393 | 95.62 | 393 | 95.62 |
| PC_3190 | HSIL | E6/E7 | 157 | 0           | HPV16,_A4REF_ASIA_EA_AF534061 | 16,_A4 Access seq | 920  | 920  | 0         | 830.84  | 490 | 95.52 | 490 | 95.52 |
| PC_3154 | HSIL | E6/E7 | 200 | 0           | HPV35,_A2REF_HQ537727         | 35,_A2 Access seq | 1000 | 1000 | 0         | 902.97  | 525 | 97.22 | 525 | 97.22 |
| PC_3167 | HSIL | E6/E7 | 198 | 0           | HPV35,_A2REF_HQ537727         | 35,_A2 Access seq | 1040 | 1040 | 0         | 939.04  | 538 | 97.82 | 538 | 97.82 |
| PC_3180 | HSIL | L1    | 265 | 0           | HPV16,_A4REF_ASIA_EA_AF534061 | 16,_A4 Access seq | 785  | 785  | 0         | 709.11  | 402 | 98.77 | 402 | 98.77 |

|         |      |       |     |            |                               |                   |      |      |           |        |     |       |     |       |
|---------|------|-------|-----|------------|-------------------------------|-------------------|------|------|-----------|--------|-----|-------|-----|-------|
| PC_3191 | HSIL | L1    | 280 | 0          | HPV16,_A4REF_ASIA_EA_AF534061 | 16,_A4 Access seq | 777  | 777  | 0         | 701.89 | 390 | 99.74 | 390 | 99.74 |
| PC_3155 | HSIL | L1    | 387 | 4.437E-153 | HPV39,_A1REF_PPHT39           | 39,_A1 Access seq | 1028 | 594  | 4.44E-153 | 536.89 | 359 | 90.89 | 359 | 90.89 |
| PC_3168 | HSIL | E6/E7 | 159 | 0          | HPV16,_A2REF_EU_AF536179      | 16,_A2 Access seq | 928  | 928  | 0         | 838.05 | 525 | 93.58 | 525 | 93.58 |
| PC_3181 | HSIL | L1    | 247 | 0          | HPV16,_A4REF_ASIA_EA_AF534061 | 16,_A4 Access seq | 783  | 783  | 0         | 707.3  | 393 | 99.75 | 393 | 99.75 |
| PC_3192 | HSIL | E6/E7 | 177 | 0          | HPV33,_A2REF_HQ537698         | 33,_A2 Access seq | 1056 | 1056 | 0         | 953.47 | 545 | 98.38 | 545 | 98.38 |
| PC_3169 | HSIL | E6/E7 | 164 | 0          | HPV16,_A1REF_EU_PPH16         | 16,_A1 Access seq | 1036 | 1036 | 0         | 935.43 | 521 | 99.62 | 521 | 99.62 |
| PC_3182 | HSIL | E6/E7 | 207 | 0          | HPV39,_A2REF_KC470239         | 39,_A2 Access seq | 1016 | 982  | 0         | 886.74 | 515 | 96.08 | 515 | 96.08 |
| PC_3193 | HSIL | E6/E7 | 150 | 0          | HPV16,_A1REF_EU_PPH16         | 16,_A1 Access seq | 1064 | 1064 | 0         | 960.68 | 558 | 96.37 | 558 | 96.37 |
| PC_3157 | HSIL | E6/E7 | 141 | 0          | HPV16,_A1REF_EU_PPH16         | 16,_A1 Access seq | 1068 | 1068 | 0         | 964.28 | 549 | 98.39 | 549 | 98.39 |
| PC_3173 | HSIL | E6/E7 | 182 | 0          | HPV35,_A2REF_HQ537727         | 35,_A2 Access seq | 1100 | 1100 | 0         | 993.14 | 566 | 97.92 | 566 | 97.92 |
| PC_3184 | HSIL | E6/E7 | 167 | 0          | HPV16,_A1REF_EU_PPH16         | 16,_A1 Access seq | 1050 | 1050 | 0         | 948.05 | 545 | 96.63 | 545 | 96.63 |
| PC_3195 | HSIL | E6/E7 | 178 | 0          | HPV18,_A2REF_EF202146         | 18,_A2 Access seq | 1024 | 1024 | 0         | 924.61 | 520 | 99.05 | 520 | 99.05 |
| PC_3158 | HSIL | E6/E7 | 145 | 0          | HPV16,_A2REF_EU_AF536179      | 16,_A2 Access seq | 1000 | 1000 | 0         | 902.97 | 543 | 94.11 | 543 | 94.11 |
| PC_3174 | HSIL | L1    | 263 | 0          | HPV16,_A4REF_ASIA_EA_AF534061 | 16,_A4 Access seq | 802  | 802  | 0         | 724.44 | 401 | 100   | 401 | 100   |
| PC_3186 | HSIL | L1    | 275 | 0          | HPV83REF                      | 83 Access seq     | 760  | 760  | 0         | 686.57 | 386 | 98.97 | 386 | 98.97 |
| PC_3171 | HSIL | L1    | 270 | 0          | HPV16,_A4REF_ASIA_EA_AF534061 | 16,_A4 Access seq | 792  | 792  | 0         | 715.42 | 400 | 99.26 | 400 | 99.26 |

Access seq, Accession sequence name; E6/E7, HPV E6/E7 gene amplified by PCR; HSIL, high-grade squamous intraepithelial lesion; HPV, human papillomavirus; Info, information; ID, sample identification; L1, HPV L1 gene amplified by PCR; LSIL, low-grade squamous intraepithelial lesion; NA, not available/sequenceable; PAP, Pap smear; PCR, polymerase chain reaction; Query, sequence used for BLAST search; Seq, Sanger (dideoxy) sequencing. <sup>a</sup> Sample ID of LSIL ( $n = 95$ ) and HSIL ( $n = 60$ ) cervical cytology samples subjected to HPV E6/E7 or L1 gene amplification by PCR. The amplified nucleotide sequences i.e., query sequences were BLAST-aligned for HPV genotyping. <sup>b</sup> BLAST statistics nomenclature and definitions from left to right of table columns [47]. HSP (n), Number of high scoring pairs from the source database. Lowest E-val, Lowest Expect value. Accession (E-val), Accession name of the matched database sequence with the lowest E-value. HPV Type, HPV genotype (numeral), variant and sub-lineage (alphanumeric) of the Accession sequence. Hit, Name of the sequence found in the BLAST search with the max score. Total score, Total alignment score for all HSPs. Max score, Maximum (best) score or highest alignment score of all HSPs. Min E-value, Minimum (best) e-value of all HSPs. Max bit score, Maximum (best) bit score of all HSPs. Max id, Maximum number of identical residues in the query and Hit sequence. Max %id, Percentage of maximum identical residues in the query and Hit sequence. Max pos, Maximum number of similar but not necessarily identical residues in the query and Hit sequence. Max %pos, Percentage of maximum similar but not necessarily identical residues in the query and Hit sequence. <sup>c</sup> HPV genotype as determined by BLAST alignment of E6/E7 amplicon/Sanger-based sequences and assigned according to the best Hit result. HPV genotypes are in numerals; variant lineage and sublineage are in alphanumeric values, respectively. For non-sequenceable or interpretable E6/E7 results, HPV L1 sequencing results ( $n = 16$ ) were used alternatively for genotype determination. Samples (9/155 samples, 5.81%) with discordant HPV typing results by Sanger sequencing/BLAST and deep sequencing/taxonomic profiling are in bold. <sup>d</sup> Hit result with the max bit score were identical to the Accession sequence.
